# Supplementary material for: Development of fluorescence sensors with copper-based nanoclusters via Förster resonance energy transfer and the quenching effect for vanillin detection
Source: Royal Society of Chemistry journal article supplement (doi:10.1039/d2ay01170k), 2022-01-01
Supplement: d2ay01170k1.pdf [file d2ay01170k1.pdf]

## **Electronic Supporting Information**

### **Development of Fluorescence Sensors with Copper-based Nanoclusters via Förster Resonance Energy Transfer and the Quenching Effect for Vanillin**

#### **Detection**

Hong Zhai, Mengmeng Gao, Yunfeng Bai, Jun Qin, Qing Song, Zhixiong Liu, Haiyan Wang\*,

Feng Feng\*

College of Chemistry and Chemical Engineering, Shanxi Provincial Key Laboratory of Chemical

Biosensing, Shanxi Datong University, Datong, 037009, China

\* Corresponding author.

E-mail: why7135280@126.com (H. Wang)

feng-feng64@263.net (F. Feng).

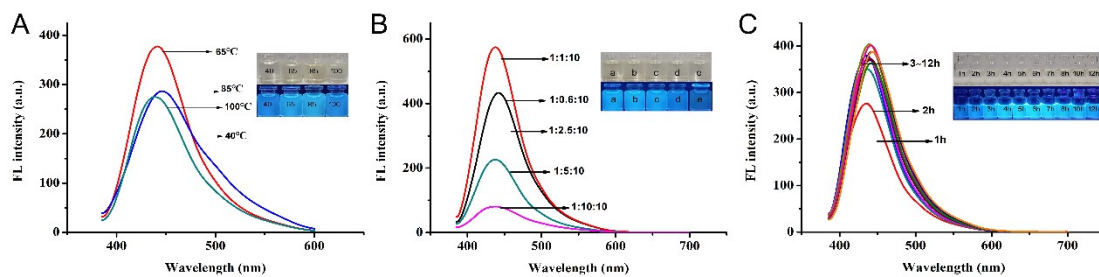

Fig. S1 Optimization of synthesis conditions of CuNCs. (A) temperature (B) molar ratio ( $\text{Cu}^{2+}$ :SH- $\beta$ -CD:AA) (C)

time.

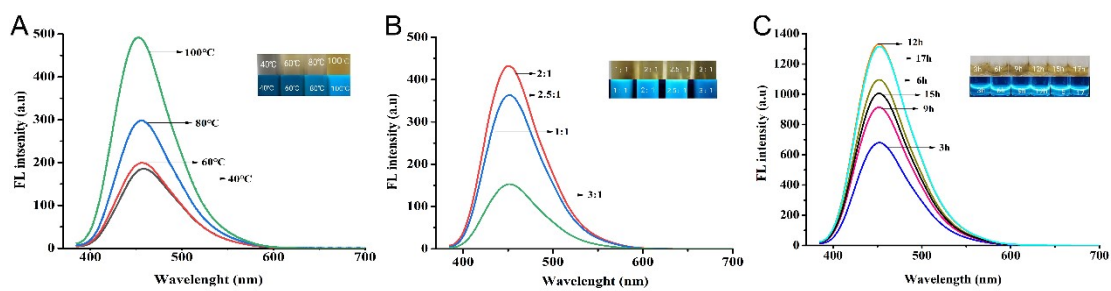

Fig. S2 Optimization of synthesis conditions of CuAuNCs. (A) temperature (B) molar ratio (copper ion :chloroauric acid) (C) time.

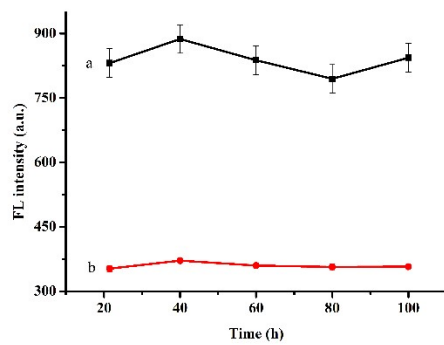

Fig. S3 Fluorescent stability with time (a: CuNCs, b: CuAuNCs)

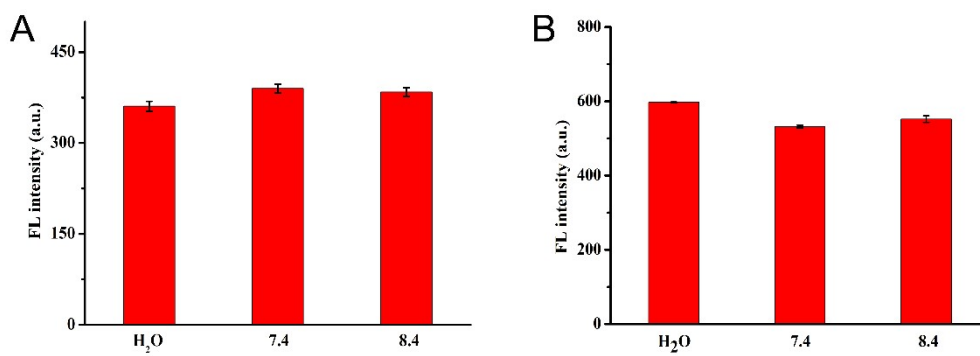

Fig. S4 Fluorescent stability in H<sub>2</sub>O and 0.01 M PBS buffers (pH 7.4, 8.4) (A) CuNCs (B) CuAuNCs.

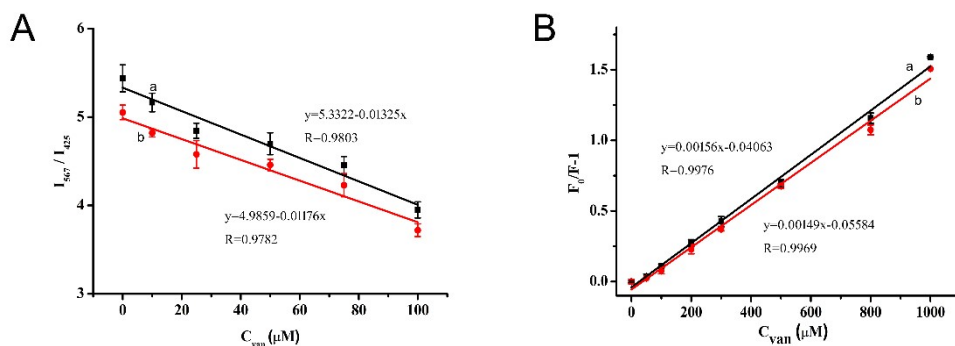

Fig. S5 Linear curve fitting of vanillin by (A) FRET system between CuNCs and NR, (B) CuAuNCs (a: Regression curves of vanillin standard series solutions, b: Spiked recovery curve of milk pretreatment solution).

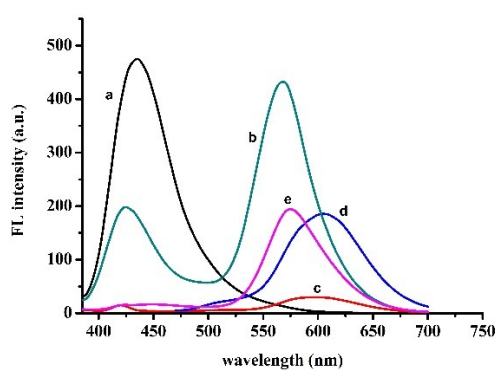

Fig. S6 Fluorescence spectra. (a) CuNCs (100  $\mu$ L). (b) CuNCs (100  $\mu$ L) + NR ( $10^{-4}$  M). (c) NR ( $10^{-4}$  M,  $\lambda_{ex}=365$  nm). (d) NR ( $10^{-4}$  M,  $\lambda_{ex}=450$  nm). (e)  $\beta$ -CD (4 mM) + NR ( $10^{-4}$  M).

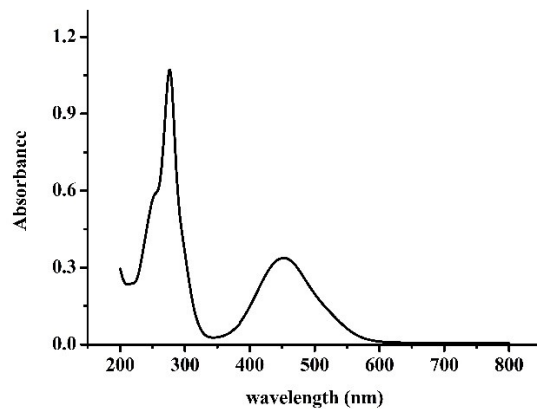

Fig. S7 UV Spectrum of NR

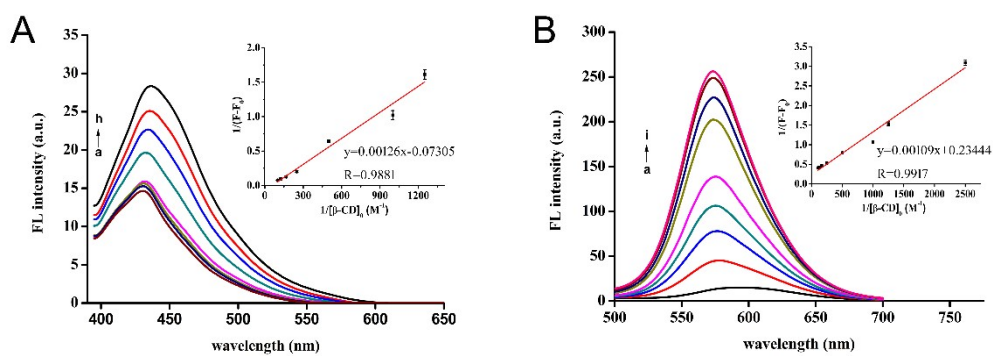

Fig. S8 (A) Fluorescence spectra of vanillin ( $2 \times 10^{-6}$  M) at pH 8.4 containing (1) 0, (2) 0.8, (3) 1.0, (4) 2.0, (5) 4.0, (6) 6.0, (7) 7.0, and (8) 10 mM  $\beta$ -CD. (B) Fluorescence spectra of NR ( $1.0 \times 10^{-5}$  M) at pH 8.4 containing (1) 0, (2) 0.4, (3) 0.8, (4) 1.0, (5) 2.0, (6) 4.0, (7) 6.0, (8) 7.0, and (9) 10 mM  $\beta$ -CD. Inset: Double reciprocal plot of M/ $\beta$ -CD complex,  $1/(F-F_0)$  vs  $1/[CD]_0$ .

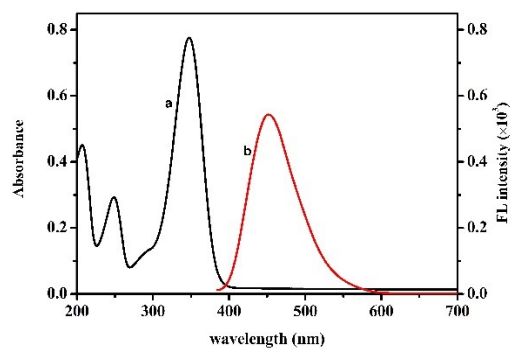

Fig. S9 UV spectrum of vanillin (a) and fluorescence spectrum of CuAuNCs (b)

Tab. S1 Comparison of various fluorescence sensors and their analytical parameters for determination of vanillin

| materials                   | Linear ranges ( $\mu\text{M}$ ) | LOD( $\mu\text{M}$ ) | Ref. |
|-----------------------------|---------------------------------|----------------------|------|
| Cd(II) coordination polymer | 0~10                            | 1.41                 | 1    |
| Zr(IV)-MOF                  | 12.5~45                         | 0.38                 | 2    |
| N-doped carbon dots (NCDs)  | 0.43~264                        | 0.10                 | 3    |
| Graphene quantum dots       | 0~10                            | 0.025                | 4    |
| CdSe/ZnS quantum dots       | 13~130                          | 6.51                 | 5    |
| CuNCs                       | 10~100                          | 8.08                 | This |
| CuAuNCs                     | 50~1000                         | 10.17                | work |

Table S2. Determination of vanillin in real samples (n=3).

| sample | Method<br>Proposed | Added ( $\mu\text{M}$ ) | Total found<br>( $\mu\text{M}$ ) | Recovery (%) | RSD (%) |
|--------|--------------------|-------------------------|----------------------------------|--------------|---------|
| milk   | FRET between       | 30                      | 31.2                             | 103.9        | 3.43    |
|        | CuNCs and NR       | 80                      | 79.8                             | 99.7         | 2.15    |
|        | Quenching by       | 250                     | 253.6                            | 101.4        | 4.39    |
|        | CuAuNCs            | 700                     | 719.6                            | 102.8        | 0.78    |

[1] Y. X. Chen, G. C. Liu, X. Lu and X. L. Wang, A water-stable new luminescent Cd(II) coordination polymer for rapid and luminescent/visible sensing of vanillin in infant formula, *Inorg. Chim. Acta*, 2022, 540, 121051.

[2] Y. B. Ren, H. Y. Xu, J. W. Yan, D. X. Cao and J. L. Du, Multifunctional luminescent Zr(IV)-MOF for rapid and efficient detection of vanillin,  $\text{CrO}_4^{2-}$  and  $\text{Cr}_2\text{O}_7^{2-}$  ions, *Spectrochim. Acta A*, 2022, 278, 121390.

[3] Y. P. Wang, Q.L. Yue, Y. Y. Hu, C. Liu, L. X. Tao and C. Zhang, Synthesis of N-doped carbon dots and application in vanillin detection based on collisional quenching, *RSC Adv.*, 2019, 9, 4022–40227.

[4] S. J. Zhu, X. X. Bai, T. Wang, Q. Shi, J. Zhu and B. Wang. One-step synthesis of fluorescent graphene quantum dots as an effective fluorescence probe for vanillin detection, *RSC Adv.*, 2021, 11, 9121-9129.

[5] G. M. Durán, A. M. Contento, Á. Ríos.  $\beta$ -Cyclodextrin coated CdSe/ZnS quantum dots for vanillin sensing in food samples, *Talanta*, 2015, 131: 286–291.
